# Supplementary material for: Sandwich-type Na6B7− and Na8B7+ clusters: charge-transfer complexes, four-fold π/σ aromaticity, and dynamic fluxionality
Source: Royal Society of Chemistry journal article supplement (doi:10.1039/c9cp03611c), 2019-01-01
Supplement: c9cp03611c1.pdf [file c9cp03611c1.pdf]

## SUPPLEMENTARY INFORMATION

### Sandwich-type $\text{Na}_6\text{B}_7^-$ and $\text{Na}_8\text{B}_7^+$ clusters: Charge-transfer complexes, four-fold $\pi/\sigma$ aromaticity, and dynamic fluxionality†

Ying-Jin Wang,<sup>‡a,b</sup> Lin-Yan Feng,<sup>‡b</sup> and Hua-Jin Zhai<sup>\*b</sup>

<sup>a</sup>Department of Chemistry, Xinzhou Teachers University, Xinzhou 034000, China

<sup>b</sup>Nanocluster Laboratory, Institute of Molecular Science, Shanxi University, Taiyuan 030006, China

\*E-mail: hj.zhai@sxu.edu.cn

### Supplementary Information – Part I

- Table S1.** Cartesian coordinates for the global-minimum (GM) structures of  $\text{Na}_6\text{B}_7^-$  (**1**,  $D_{3d}$ ,  $^1A_{1g}$ ) and  $\text{Na}_8\text{B}_7^+$  (**5**,  $D_{3d}$ ,  $^1A_{1g}$ ) clusters at the PBE0/6-311+G\* level.
- Figure S1.** Alternative low-lying structures of  $\text{Na}_6\text{B}_7^-$  cluster. Relative energies at the PBE0/6-311+G\* level are shown in square brackets, with corrections for zero-point energies (ZPEs). Also shown are energies for top low-lying isomers at the single-point CCSD(T)/6-311G\*\*/PBE0/6-311+G\* level. All energies are in eV.
- Figure S2.** Alternative low-lying structures of  $\text{Na}_8\text{B}_7^+$  cluster. Relative energies at the PBE0/6-311+G\* level are shown in square brackets, with corrections for ZPEs. Also shown are energies for top low-lying isomers at the single-point CCSD(T)/6-311G\*\*/PBE0/6-311+G\* level. All energies are in eV.
- Figure S3.** Structural evolution of  $\text{Na}_8\text{B}_7^+$  cluster during the dynamic rotations. Two pathways are available via transition states **6** and **7**, which are denoted as TS<sub>1</sub> and

TS<sub>2</sub>, respectively. Each pathway is associated to a soft vibrational mode of Na<sub>8</sub>B<sub>7</sub><sup>+</sup> cluster. The lower pathway is related to free rotation of B<sub>7</sub> wheel against two Na<sub>4</sub> subunits, while the upper one is due to twisting between two Na<sub>4</sub> subunits.

**Figure S4.** Calculated bond distances (in Å; black color), Wiberg bond indices (WBIs; blue color), and natural atomic charges (in |e|; red color) for (a) Na<sub>6</sub>B<sub>7</sub><sup>-</sup> (**2**, TS<sub>1</sub>), (b) Na<sub>6</sub>B<sub>7</sub><sup>-</sup> (**3**, TS<sub>2</sub>), and (c) Na<sub>6</sub>B<sub>7</sub><sup>-</sup> (**4**, LM). Here TS and LM represent transition state and local minimum, respectively. WBIs and natural atomic charges are obtained from natural bond orbital (NBO) analyses at the PBE0/6-311G\* level.

**Figure S5.** Calculated bond distances (in Å; black color), WBIs (blue color), and natural atomic charges (in |e|; red color) for (a) Na<sub>8</sub>B<sub>7</sub><sup>+</sup> (**6**, TS<sub>1</sub>), (b) Na<sub>8</sub>B<sub>7</sub><sup>+</sup> (**7**, TS<sub>2</sub>), and (c) Na<sub>8</sub>B<sub>7</sub><sup>+</sup> (**8**, LM). WBIs and natural atomic charges are obtained from the NBO analyses at the PBE0/6-311G\* level.

**Figure S6.** Canonical molecular orbitals (CMOs) of *D*<sub>3d</sub> (**5**, <sup>1</sup>A<sub>1g</sub>) GM structure of Na<sub>8</sub>B<sub>7</sub><sup>+</sup> cluster. (a) Six σ CMOs for peripheral two-center two-electron (2c-2e) B–B σ bonds in the B<sub>7</sub> wheel. (b) Three delocalized σ CMOs. (c) Three delocalized π CMOs. (d) Two delocalized σ CMOs over two Na<sub>4</sub> tetrahedra. Subsystems (b) through (d) collectively render four-fold (2σ/6π/6σ/2σ) aromaticity for Na<sub>8</sub>B<sub>7</sub><sup>+</sup> cluster.

**Figure S7.** Occupied CMOs of the *D*<sub>3d</sub> (**2**, <sup>1</sup>A<sub>1g</sub>) TS<sub>1</sub> structure for Na<sub>6</sub>B<sub>7</sub><sup>-</sup> cluster. The CMOs are similar to those in Figs. 4 and S6, except for a slight spatial shift of the electron clouds, which does not alter the essence of chemical bonding.

**Figure S8.** Bonding pattern of the *D*<sub>3d</sub> (**2**, <sup>1</sup>A<sub>1g</sub>) TS<sub>1</sub> structure for Na<sub>6</sub>B<sub>7</sub><sup>-</sup> cluster on the basis of adaptive natural density partitioning (AdNDP) analysis. Occupation numbers (ONs) are indicated.

**Figure S9.** Occupied CMOs of the *D*<sub>3h</sub> (**4**, <sup>1</sup>A<sub>1</sub>') LM structure for Na<sub>6</sub>B<sub>7</sub><sup>-</sup> cluster. The CMOs are similar to those in Figs. 4, S6, and S7, except for a slight spatial shift of the electron clouds, which does not alter the essence of chemical bonding.

**Figure S10.** AdNDP bonding pattern of the  $D_{3h}$  (**4**,  $^1A_1'$ ) LM structure for  $\text{Na}_6\text{B}_7^-$  cluster. ONs are indicated.

**Figure S11.** Simulated photoelectron spectrum of  $\text{Na}_6\text{B}_7^-$  cluster at the time-dependent PBE0/6-311+G\* (TD-PBE0) level. The simulation was conducted using the  $D_{3d}$  (**1**,  $^1A_{1g}$ ) GM structure by fitting the calculated vertical detachment energies (VDEs) with unit-area Gaussian functions of 0.02 eV half-width.

## Supplementary Information – Part II

**A short movie** extracted from the BOMD simulation for  $\text{Na}_6\text{B}_7^-$  cluster. The simulation was performed at 300 K for 50 ps. The movie roughly covers a time span of 8 ps. Similar BOMD properties have been probed for  $\text{Na}_8\text{B}_7^+$  cluster at 300 K (not shown).

**Figure S1.** Alternative low-lying structures of  $\text{Na}_6\text{B}_7^-$  cluster. Relative energies at the PBE0/6-311+G\* level are shown in square brackets, with corrections for zero-point energies (ZPEs). Also shown are energies for top low-lying isomers at the single-point CCSD(T)/6-311G\*//PBE0/6-311+G\* level. All energies are in eV.

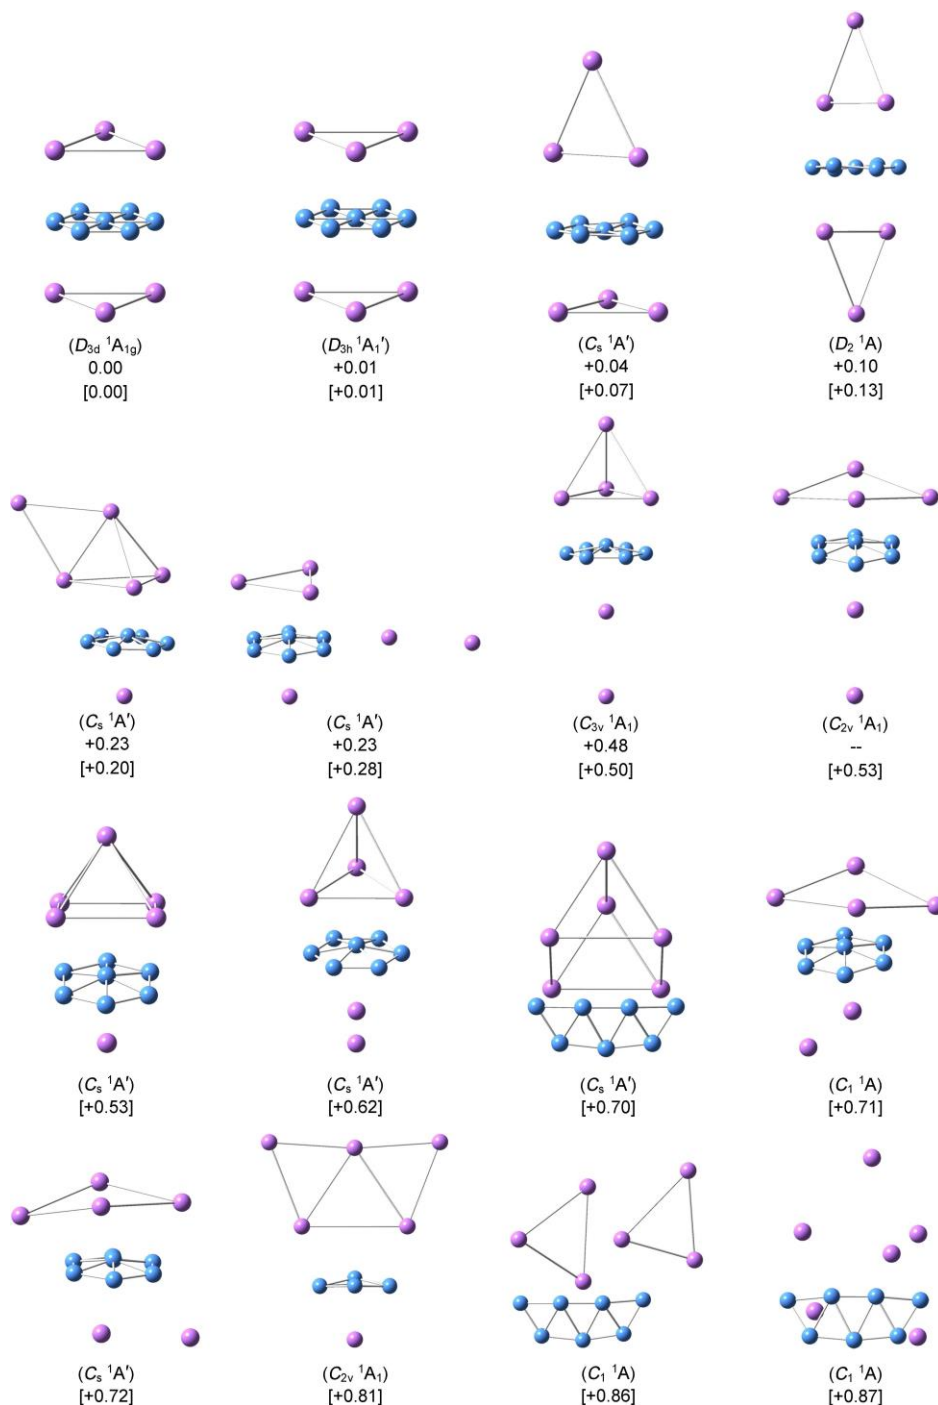

(... continued)

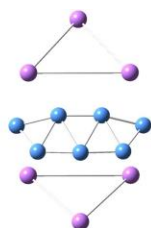

(C<sub>s</sub> 1A')  
[0.89]

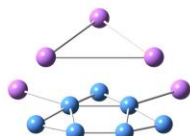

(C<sub>s</sub> 1A')  
[+0.91]

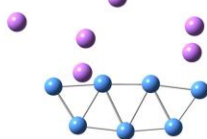

(C<sub>s</sub> 1A')  
[+0.93]

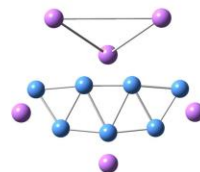

(C<sub>s</sub> 1A')  
[+0.94]

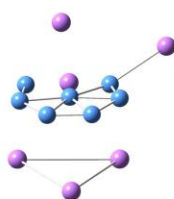

(C<sub>1</sub> 1A')  
[+0.96]

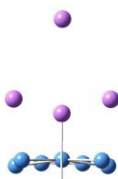

(C<sub>s</sub> 1A')  
[+0.97]

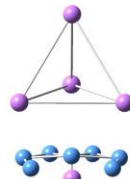

(C<sub>s</sub> 1A')  
[+0.97]

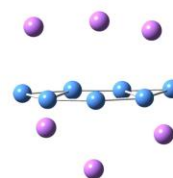

(C<sub>2</sub> 1A')  
[+1.00]

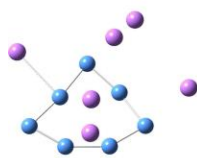

(C<sub>1</sub> 1A')  
[+1.02]

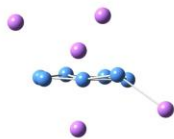

(C<sub>1</sub> 1A')  
[+1.02]

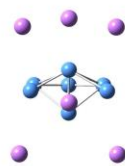

(C<sub>s</sub> 1A')  
[+1.02]

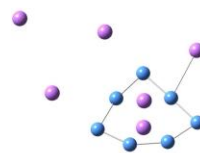

(C<sub>s</sub> 1A')  
[+1.02]

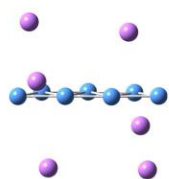

(C<sub>2</sub> 1A')  
[+1.03]

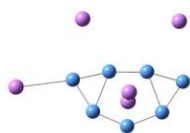

(C<sub>s</sub> 1A')  
[+1.13]

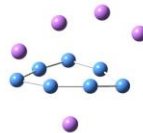

(C<sub>1</sub> 1A')  
[+1.14]

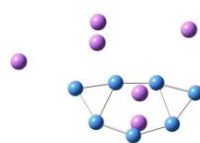

(C<sub>s</sub> 1A')  
[+1.16]

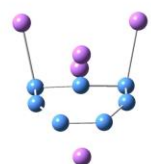

(C<sub>s</sub> 1A')  
[+1.17]

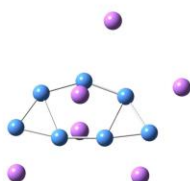

(C<sub>1</sub> 1A')  
[+1.19]

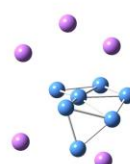

(C<sub>1</sub> 1A')  
[+1.19]

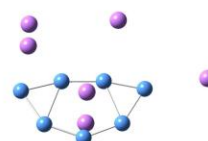

(C<sub>s</sub> 1A')  
[+1.19]

**Figure S2.** Alternative low-lying structures of  $\text{Na}_8\text{B}_7^+$  cluster. Relative energies at the PBE0/6-311+G\* level are shown in square brackets, with corrections for ZPEs. Also shown are energies for top low-lying isomers at the single-point CCSD(T)/6-311G\*\*/PBE0/6-311+G\* level. All energies are in eV.

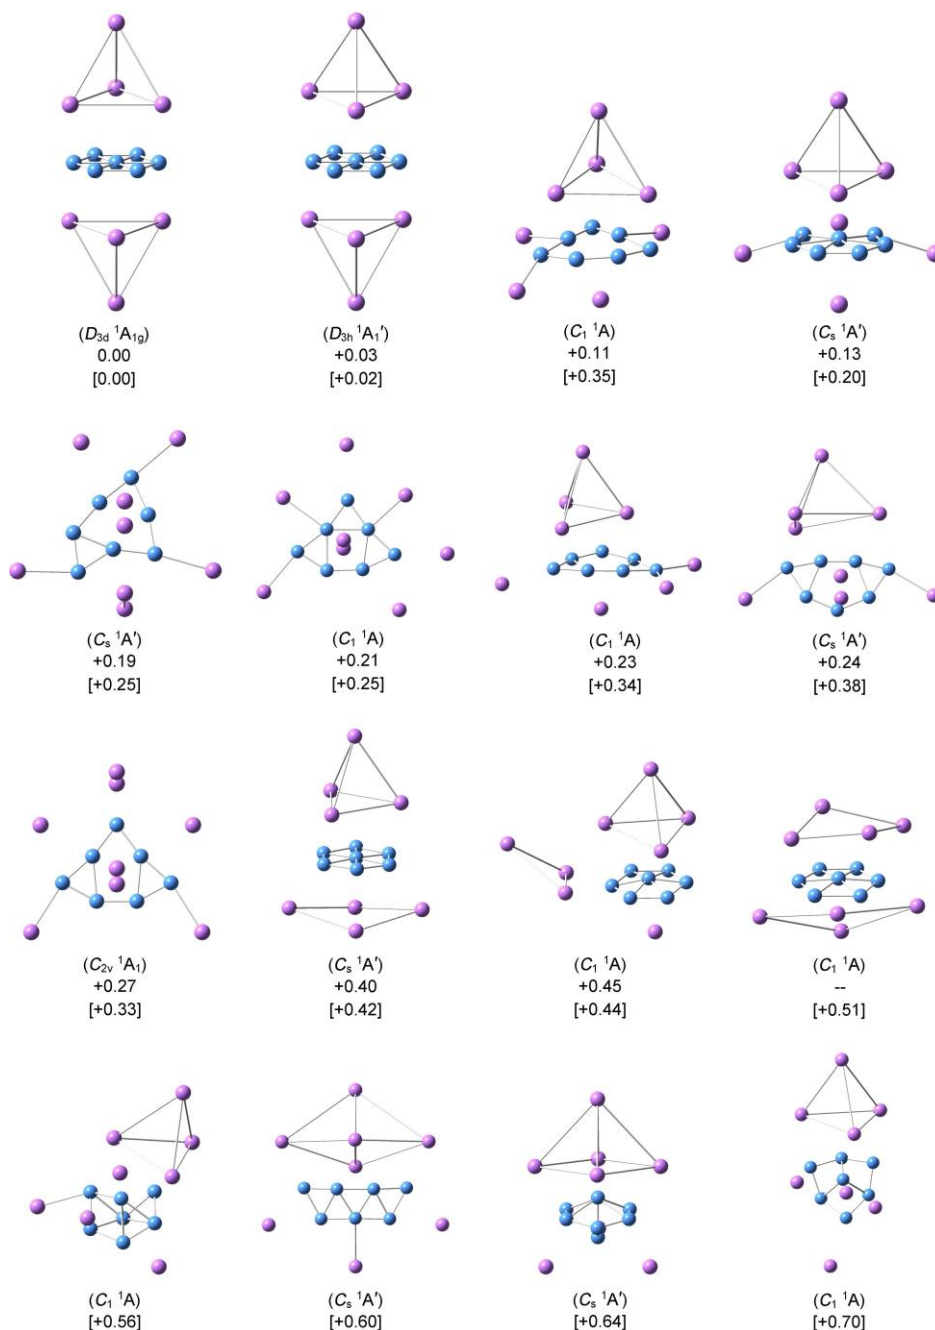

(... continued)

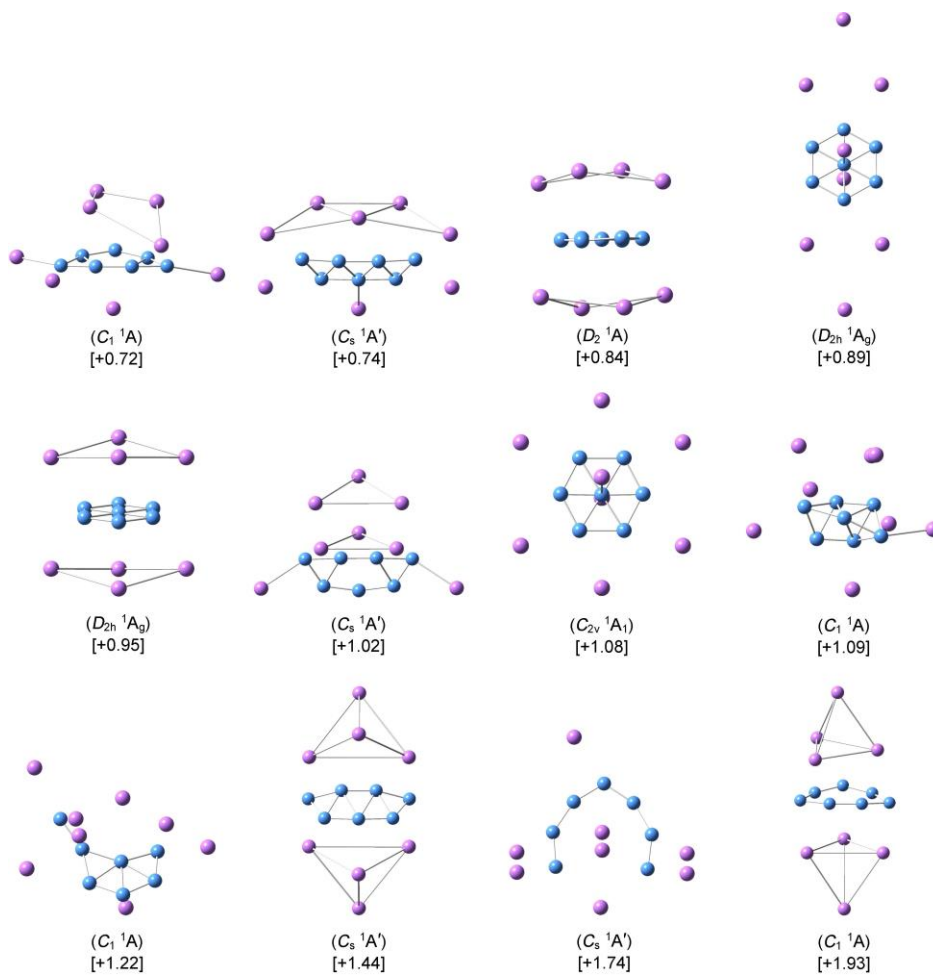

**Figure S3.** Structural evolution of  $\text{Na}_8\text{B}_7^+$  cluster during the dynamic rotations. Two pathways are available via transition states **6** and **7**, which are denoted as  $\text{TS}_1$  and  $\text{TS}_2$ , respectively. Each pathway is associated to a soft vibrational mode of  $\text{Na}_8\text{B}_7^+$  cluster. The lower pathway is related to free rotation of  $\text{B}_7$  wheel against two  $\text{Na}_4$  subunits, while the upper one is due to twisting between two  $\text{Na}_4$  subunits.

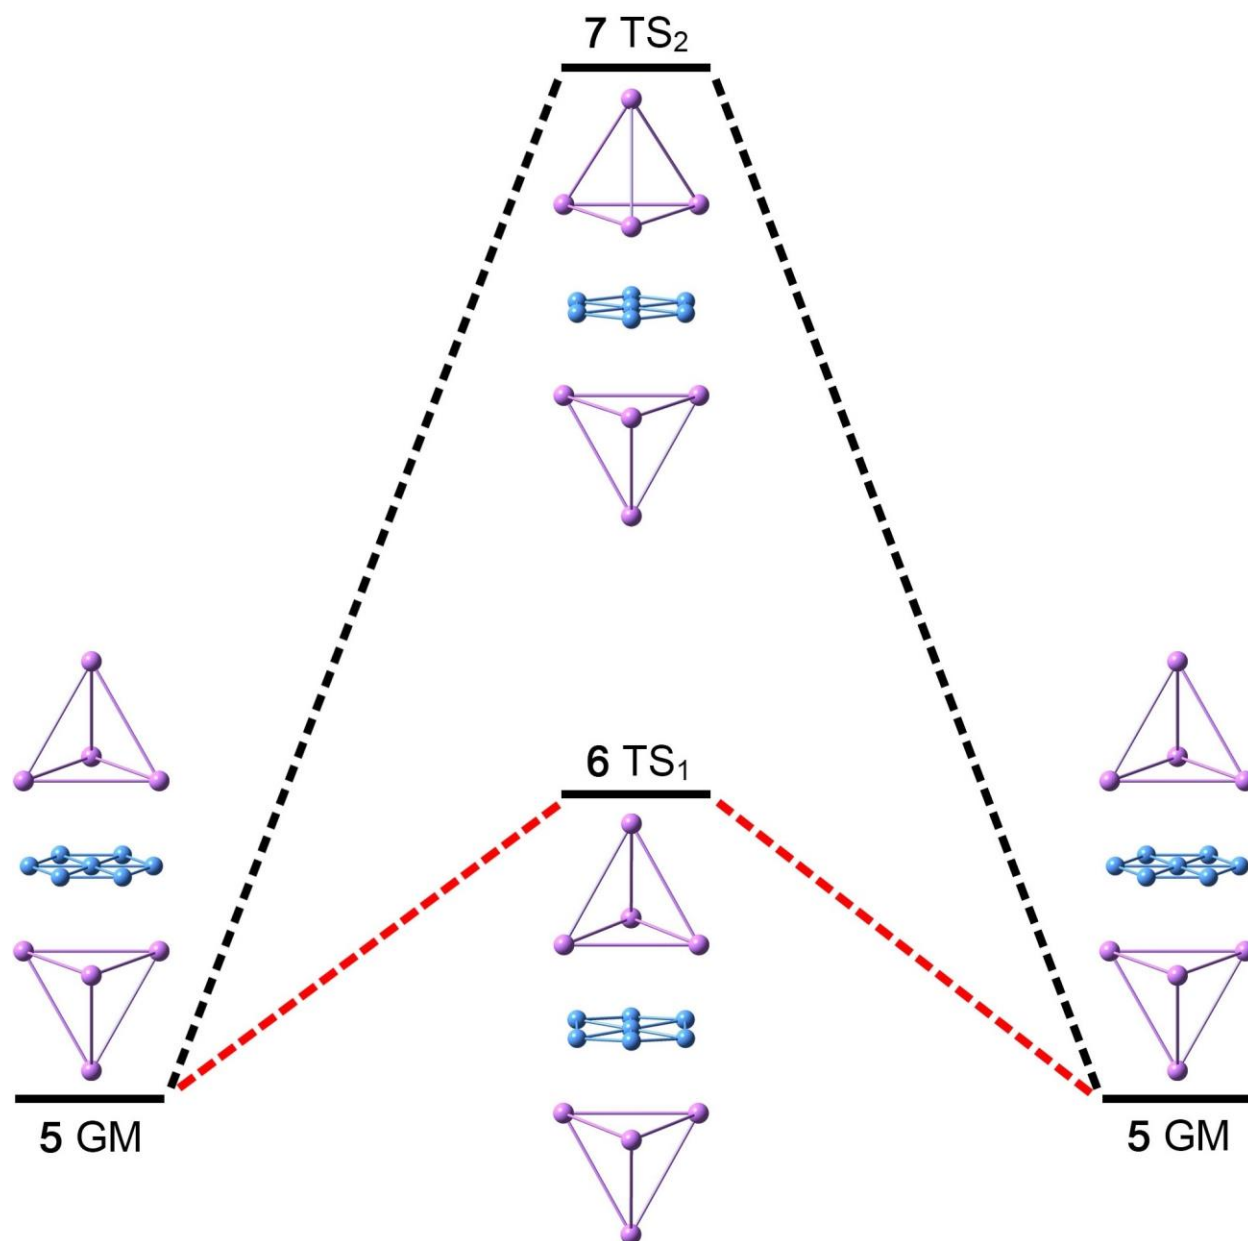



**Figure S4.** Calculated bond distances (in Å; black color), Wiberg bond indices (WBIs; blue color), and natural atomic charges (in |e|; red color) for (a)  $\text{Na}_6\text{B}_7^-$  (**2**,  $\text{TS}_1$ ), (b)  $\text{Na}_6\text{B}_7^-$  (**3**,  $\text{TS}_2$ ), and (c)  $\text{Na}_6\text{B}_7^-$  (**4**, LM). Here TS and LM represent transition state and local minimum, respectively. WBIs and natural atomic charges are obtained from natural bond orbital (NBO) analyses at the PBE0/6-311G\* level.

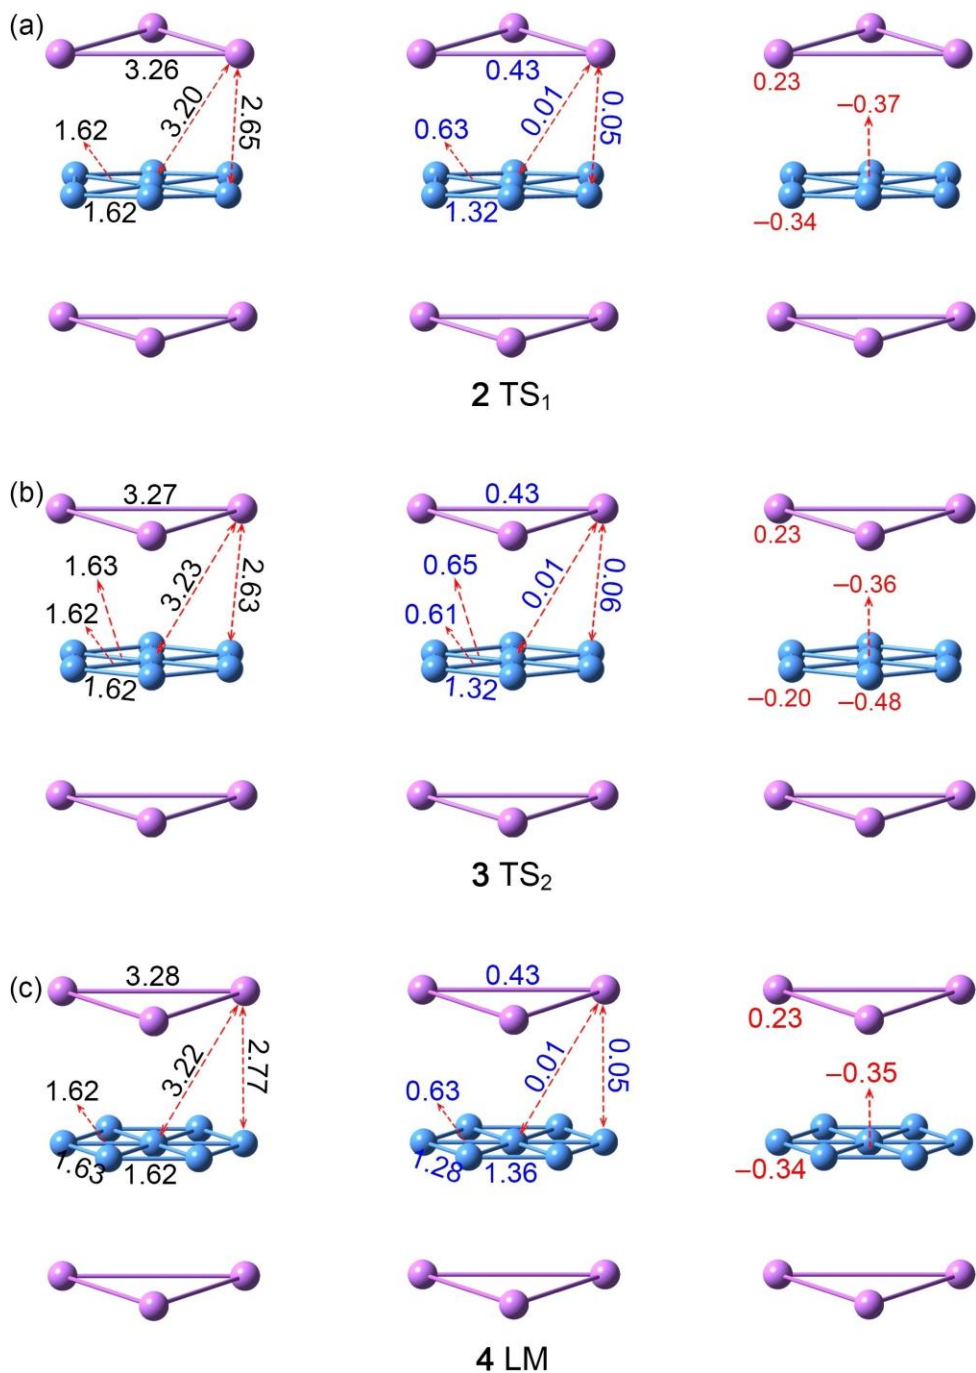

**Figure S5.** Calculated bond distances (in Å; black color), WBIs (blue color), and natural atomic charges (in |e|; red color) for (a)  $\text{Na}_8\text{B}_7^+$  (**6**,  $\text{TS}_1$ ), (b)  $\text{Na}_8\text{B}_7^+$  (**7**,  $\text{TS}_2$ ), and (c)  $\text{Na}_8\text{B}_7^+$  (**8**, LM). WBIs and natural atomic charges are obtained from the NBO analyses at the PBE0/6-311G\* level.

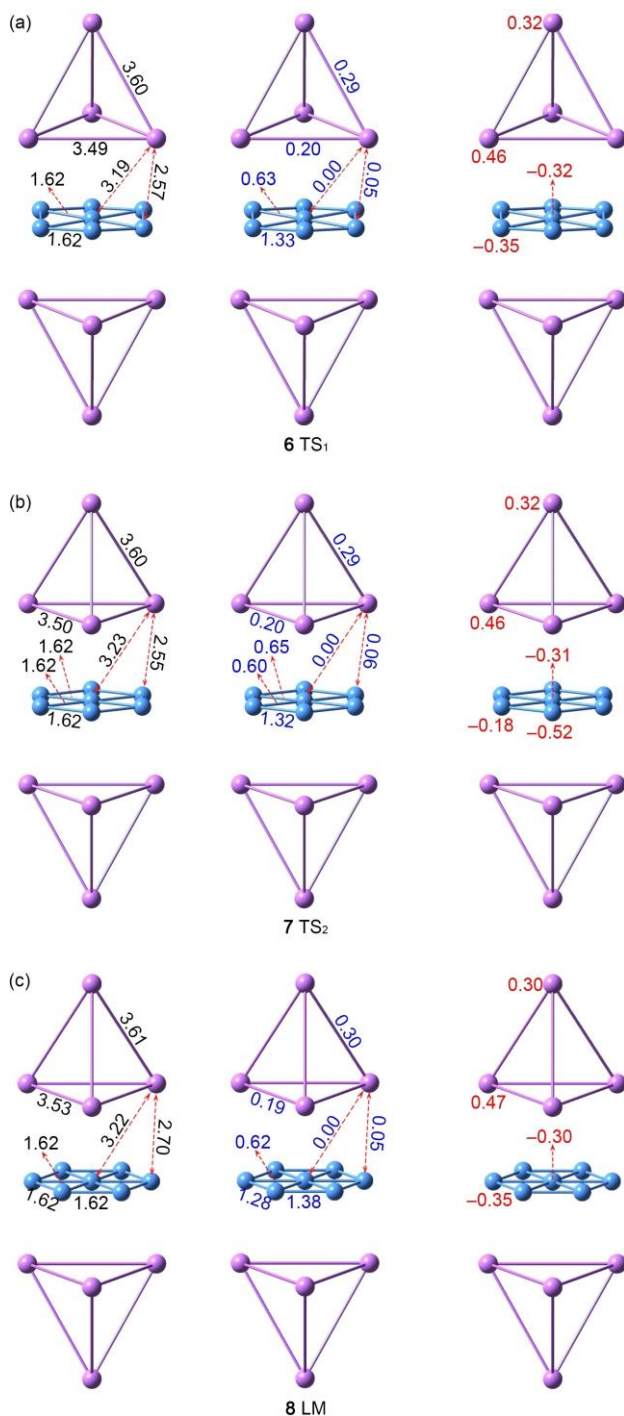

**Figure S6.** Canonical molecular orbitals (CMOs) of  $D_{3d}$  ( $5, {}^1A_{1g}$ ) GM structure of  $\text{Na}_8\text{B}_7^+$  cluster. (a) Six  $\sigma$  CMOs for peripheral two-center two-electron (2c-2e) B–B  $\sigma$  bonds in the  $\text{B}_7$  wheel. (b) Three delocalized  $\sigma$  CMOs. (c) Three delocalized  $\pi$  CMOs. (d) Two delocalized  $\sigma$  CMOs over two  $\text{Na}_4$  tetrahedra. Subsystems (b) through (d) collectively render four-fold ( $2\sigma/6\pi/6\sigma/2\sigma$ ) aromaticity for  $\text{Na}_8\text{B}_7^+$  cluster.

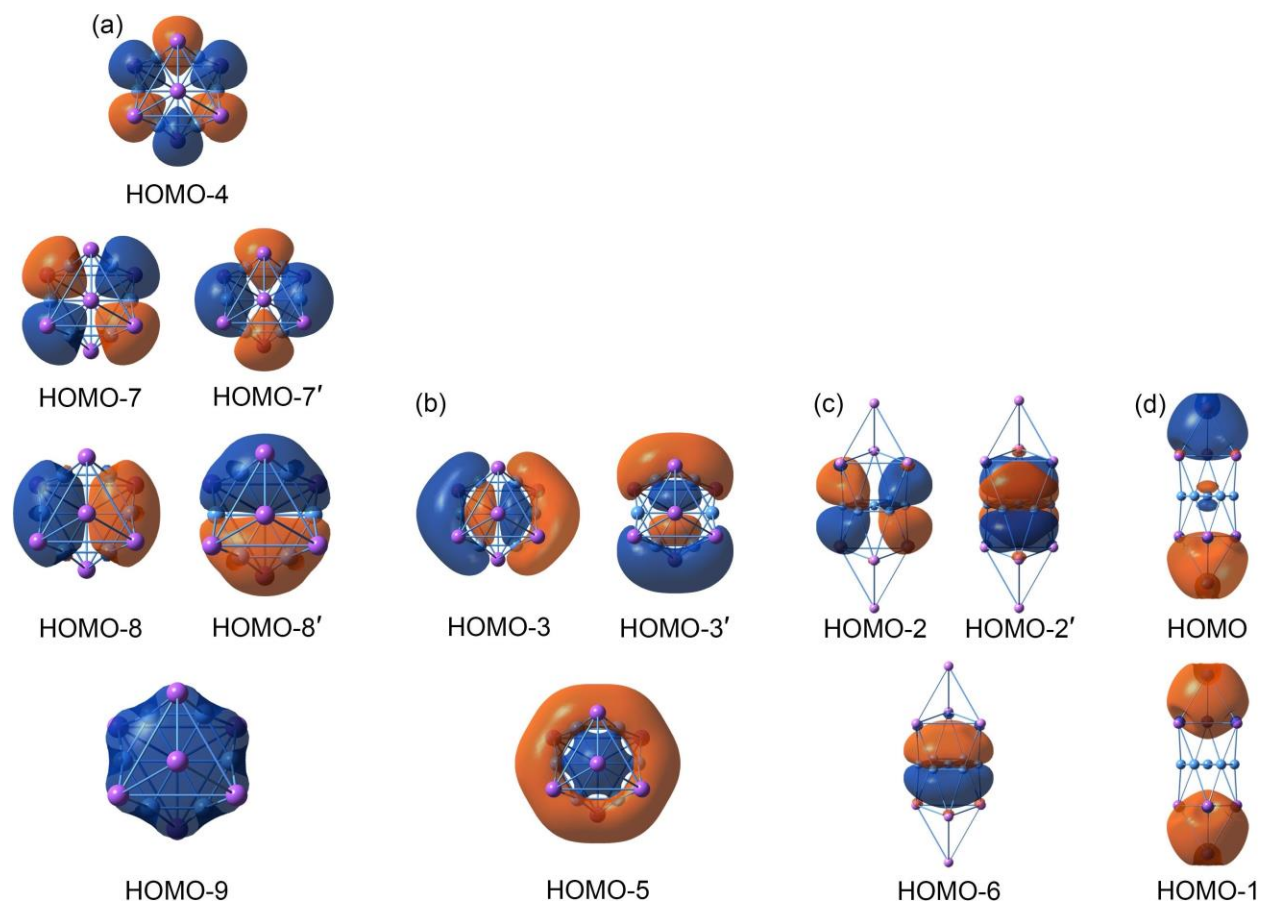

**Figure S7.** Occupied CMOs of the  $D_{3d}$  ( $2, {}^1A_{1g}$ ) TS<sub>1</sub> structure for Na<sub>6</sub>B<sub>7</sub><sup>−</sup> cluster. The CMOs are similar to those in Figs. 4 and S6, except for a slight spatial shift of the electron clouds, which does not alter the essence of chemical bonding.

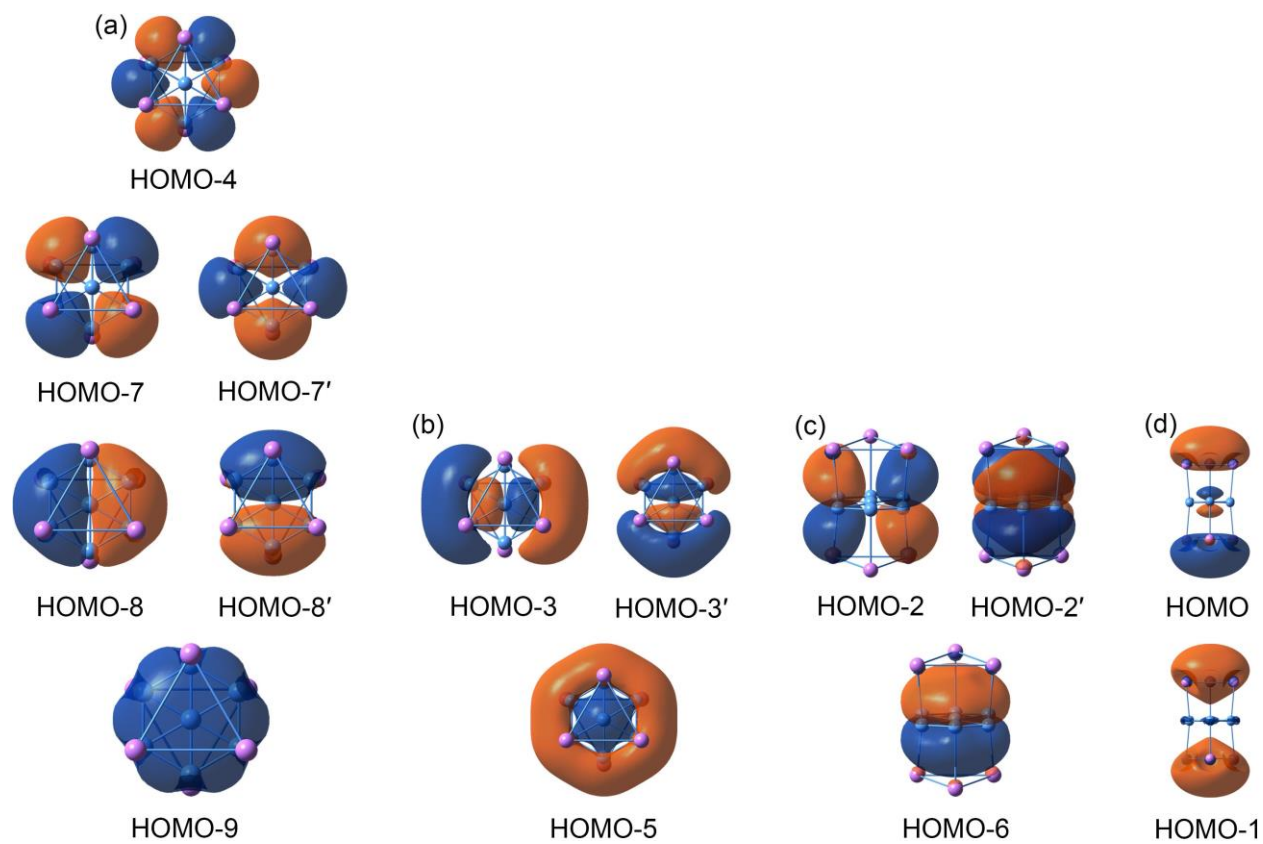

**Figure S8.** Bonding pattern of the  $D_{3d}$  ( $2, {}^1A_{1g}$ ) TS<sub>1</sub> structure for Na<sub>6</sub>B<sub>7</sub><sup>−</sup> cluster on the basis of adaptive natural density partitioning (AdNDP) analysis. Occupation numbers (ONs) are indicated.

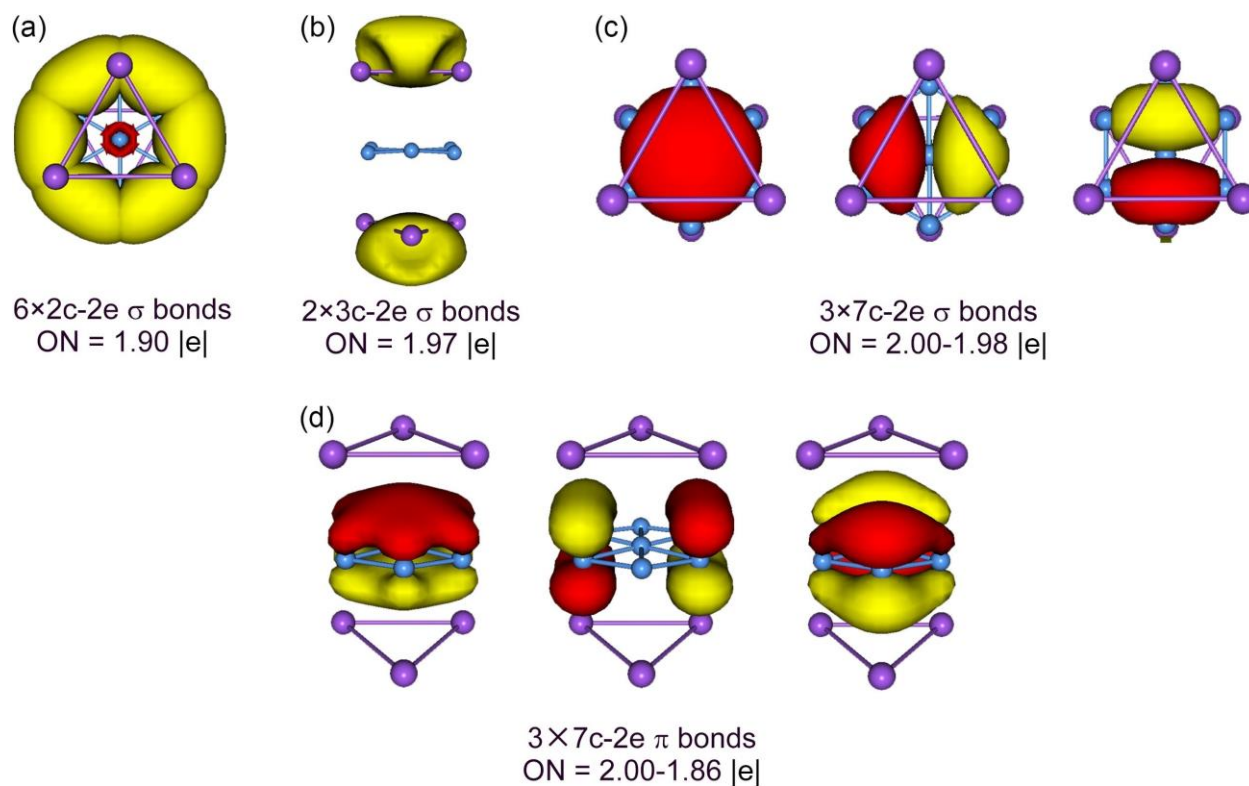

**Figure S9.** Occupied CMOs of the  $D_{3h}$  ( $4, {}^1A_1'$ ) LM structure for  $\text{Na}_6\text{B}_7^-$  cluster. The CMOs are similar to those in Figs. 4, S6, and S7, except for a slight spatial shift of the electron clouds, which does not alter the essence of chemical bonding.

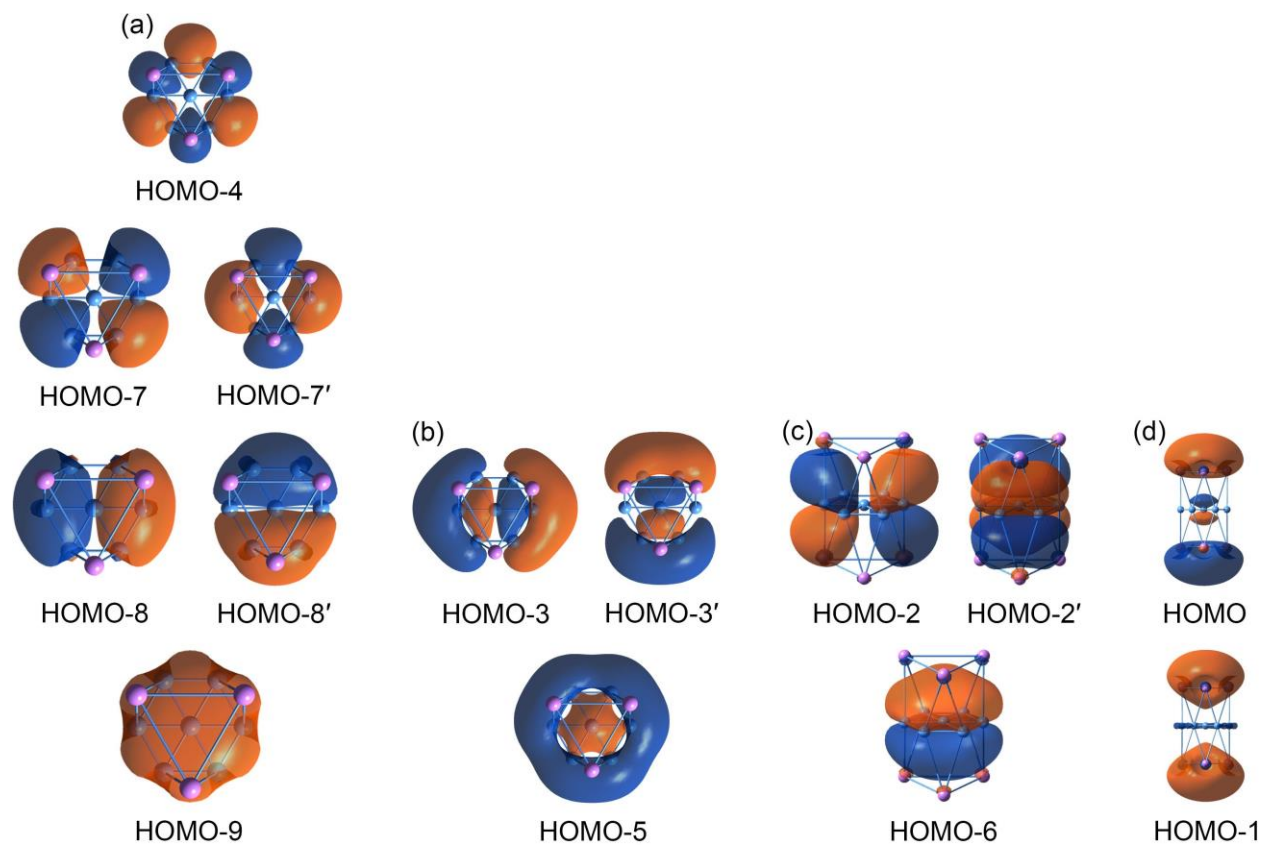



**Figure S10.** AdNDP bonding pattern of the  $D_{3h}$  ( $4, {}^1A_1'$ ) LM structure for  $\text{Na}_6\text{B}_7^-$  cluster. ONs are indicated.

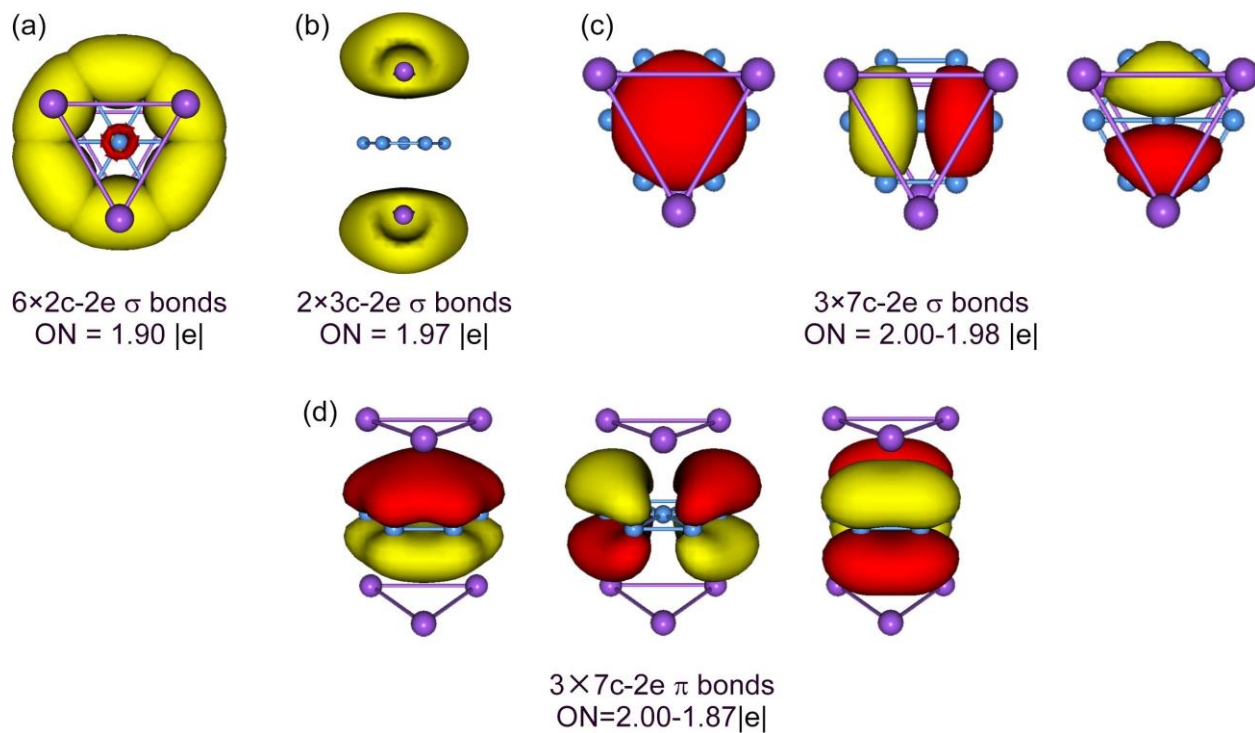

**Figure S11.** Simulated photoelectron spectrum of  $\text{Na}_6\text{B}_7^-$  cluster at the time-dependent PBE0/6-311+G\* (TD-PBE0) level. The simulation was conducted using the  $D_{3d}$  ( $1, {}^1\text{A}_{1g}$ ) GM structure by fitting the calculated vertical detachment energies (VDEs) with unit-area Gaussian functions of 0.02 eV half-width.

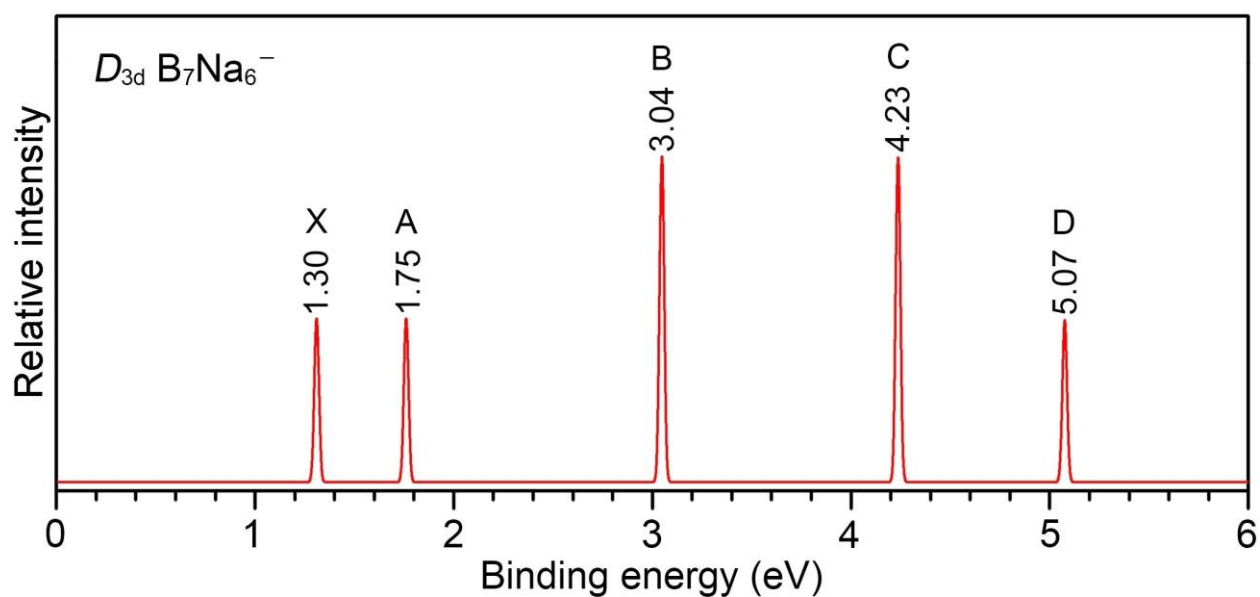



**Table S1.** Cartesian coordinates for the global-minimum (GM) structures of  $\text{Na}_6\text{B}_7^-$  (**1**,  $D_{3d}$ ,  $^1\text{A}_{1g}$ ) and  $\text{Na}_8\text{B}_7^+$  (**5**,  $D_{3d}$ ,  $^1\text{A}_{1g}$ ) clusters at the PBE0/6-311+G\* level.

(a) GM,  $\text{Na}_6\text{B}_7^-$  (**1**,  $D_{3d}$ ,  $^1\text{A}_{1g}$ )

|    |             |             |             |
|----|-------------|-------------|-------------|
| B  | 0.81156285  | 1.40566809  | 0.00000000  |
| B  | -0.81156285 | 1.40566809  | 0.00000000  |
| B  | 0.81156285  | -1.40566809 | 0.00000000  |
| B  | -0.81156285 | -1.40566809 | 0.00000000  |
| B  | -1.62312570 | -0.00000000 | 0.00000000  |
| B  | 1.62312570  | 0.00000000  | 0.00000000  |
| B  | 0.00000000  | 0.00000000  | 0.00000000  |
| Na | 1.64088312  | 0.94736431  | 2.59772681  |
| Na | -0.00000000 | 1.89472862  | -2.59772681 |
| Na | -1.64088312 | 0.94736431  | 2.59772681  |
| Na | -1.64088312 | -0.94736431 | -2.59772681 |
| Na | 0.00000000  | -1.89472862 | 2.59772681  |
| Na | 1.64088312  | -0.94736431 | -2.59772681 |

(b) GM,  $\text{Na}_8\text{B}_7^+$  (**5**,  $D_{3d}$ ,  $^1\text{A}_{1g}$ )

|    |             |             |            |
|----|-------------|-------------|------------|
| B  | 0.81035200  | 1.40357100  | 0.00000000 |
| B  | -0.81035200 | 1.40357100  | 0.00000000 |
| B  | 0.81035200  | -1.40357100 | 0.00000000 |
| B  | -0.81035200 | -1.40357100 | 0.00000000 |
| B  | -1.62070400 | 0.00000000  | 0.00000000 |
| B  | 1.62070400  | 0.00000000  | 0.00000000 |
| B  | 0.00000000  | 0.00000000  | 0.00000000 |
| Na | 1.76725100  | 1.02032300  | 2.48933400 |

|    |             |             |             |
|----|-------------|-------------|-------------|
| Na | 0.00000000  | 2.04064600  | -2.48933400 |
| Na | -1.76725100 | 1.02032300  | 2.48933400  |
| Na | -1.76725100 | -1.02032300 | -2.48933400 |
| Na | 0.00000000  | -2.04064600 | 2.48933400  |
| Na | 1.76725100  | -1.02032300 | -2.48933400 |
| Na | 0.00000000  | 0.00000000  | 5.46523900  |
| Na | 0.00000000  | 0.00000000  | -5.46523900 |
